# Supplementary material for: Glasdegib Dimaleate: Synthesis, Characterization and Comparison of Its Properties with Monomaleate Analogue
Source: MDPI journal article supplement (doi:10.3390/pharmaceutics14081641), 2022-08-06
Supplement: s1 [file s1]

# Supplementary Materials: Glasdegib Dimaleate Form: Synthesis, Characterization and Comparison of its Properties with Monomaleate Analogue

**Boris Peklar <sup>1,2</sup>, Franc Perdih <sup>3</sup>, Damjan Makuc <sup>4,5</sup>, Janez Plavec <sup>4,5</sup>, Jérôme Cluzeau <sup>1</sup>, Zoran Kitanovski <sup>1</sup> and Zdenko Časar <sup>1,6,\*</sup>**

<sup>1</sup> Lek Pharmaceuticals d.d.; Sandoz Development Center Slovenia, Kolodvorska 27, 1234 Mengeš, Slovenia

<sup>2</sup> University of Maribor, Faculty of Chemistry and Chemical Engineering, Smetanova ulica 17, 2000 Maribor, Slovenia

<sup>3</sup> University of Ljubljana, Faculty of Chemistry and Chemical Technology, Večna pot 113, 1000 Ljubljana, Slovenia

<sup>4</sup> National Institute of Chemistry, Slovenian NMR Centre, Hajdrihova 19, SI-1001 Ljubljana, Slovenia

<sup>5</sup> EN-FIST Centre of Excellence, Trg Osvobodilne fronte 13, SI-1000 Ljubljana, Slovenia

<sup>6</sup> Faculty of Pharmacy, University of Ljubljana, Aškerčeva cesta 7, SI-1000 Ljubljana, Slovenia

\* Correspondence: [zdenko.casar@sandoz.com](mailto:zdenko.casar@sandoz.com), [zdenko.casar@ffa.uni-lj.si](mailto:zdenko.casar@ffa.uni-lj.si)

## Table of Contents

|      |                                                                                        |     |
|------|----------------------------------------------------------------------------------------|-----|
| 1.   | DSC & TGA thermograms .....                                                            | S2  |
| 2.   | Infrared spectra .....                                                                 | S4  |
| 3.   | Raman spectra .....                                                                    | S8  |
| 4.   | PXRD diffractograms .....                                                              | S10 |
| 5.   | LC Chromatograms.....                                                                  | S14 |
| 6.   | ssNMR spectra .....                                                                    | S15 |
| 7.   | Solution <sup>1</sup> H- and <sup>13</sup> C-NMR spectra of glasdegib derivatives..... | S16 |
| 7.1. | Glasdegib monomaleate .....                                                            | S16 |
| 7.2. | Glasdegib dimaleate .....                                                              | S18 |
| 8.   | Calculated pK <sub>a</sub> data of glasdegib and maleic acid.....                      | S20 |

## 1. DSC & TGA thermograms

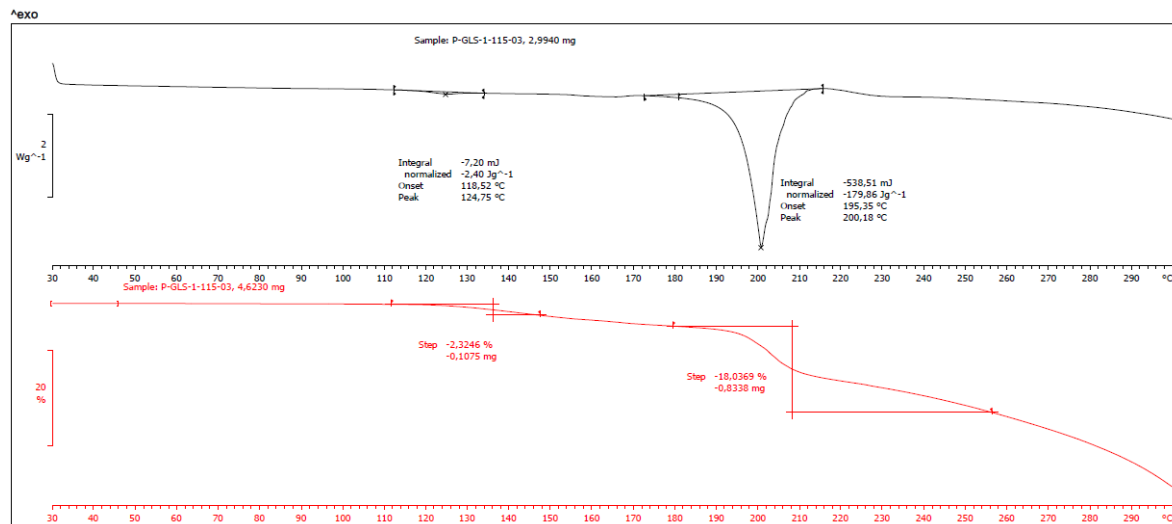

Figure S1: DSC & TGA thermogram of glasdegib monomaleate.

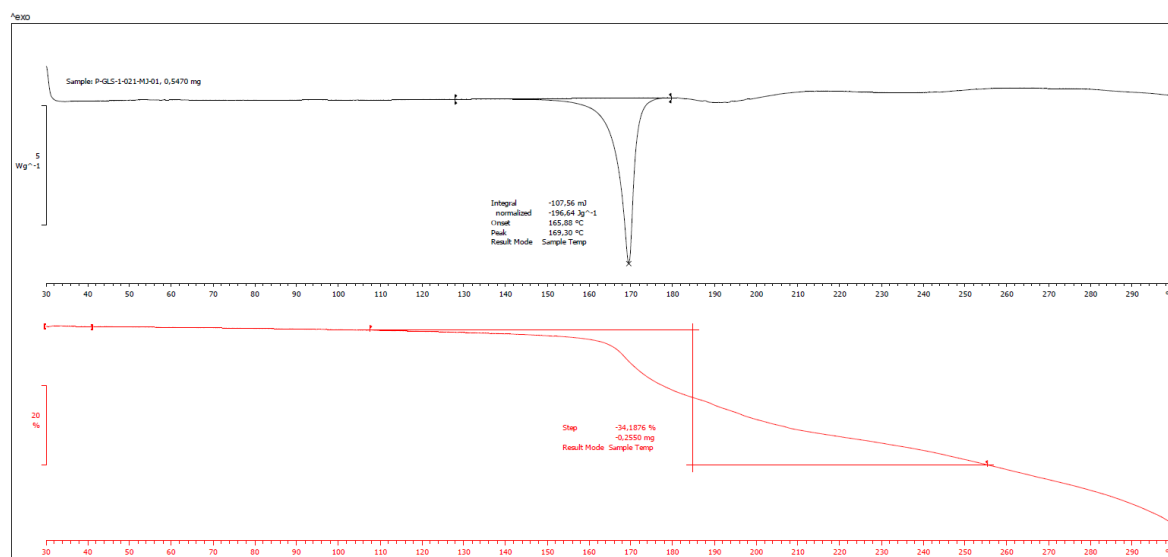

Figure S2: DSC & TGA thermogram of glasdegib dimaleate.

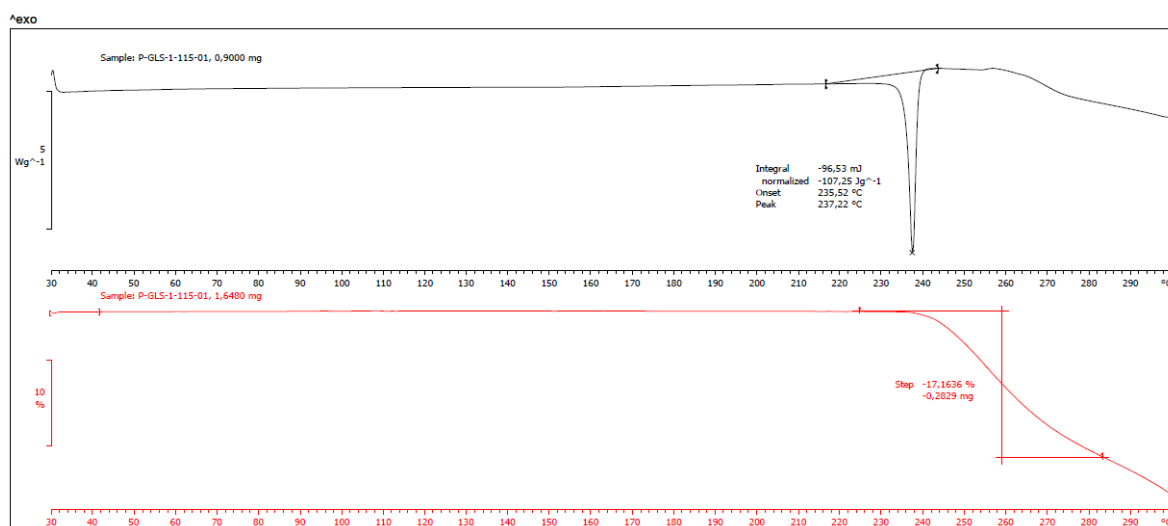

Figure S3: DSC &amp; TGA thermogram of glasdegib base.

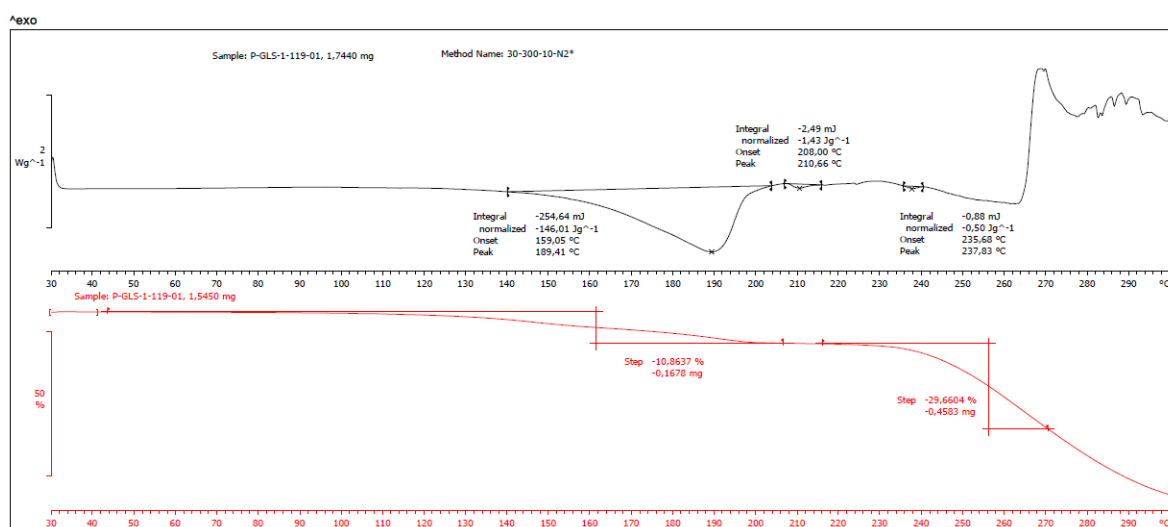

Figure S4: DSC &amp; TGA thermogram of glasdegib dihydrochloride hydrate.

## 2. Infrared spectra

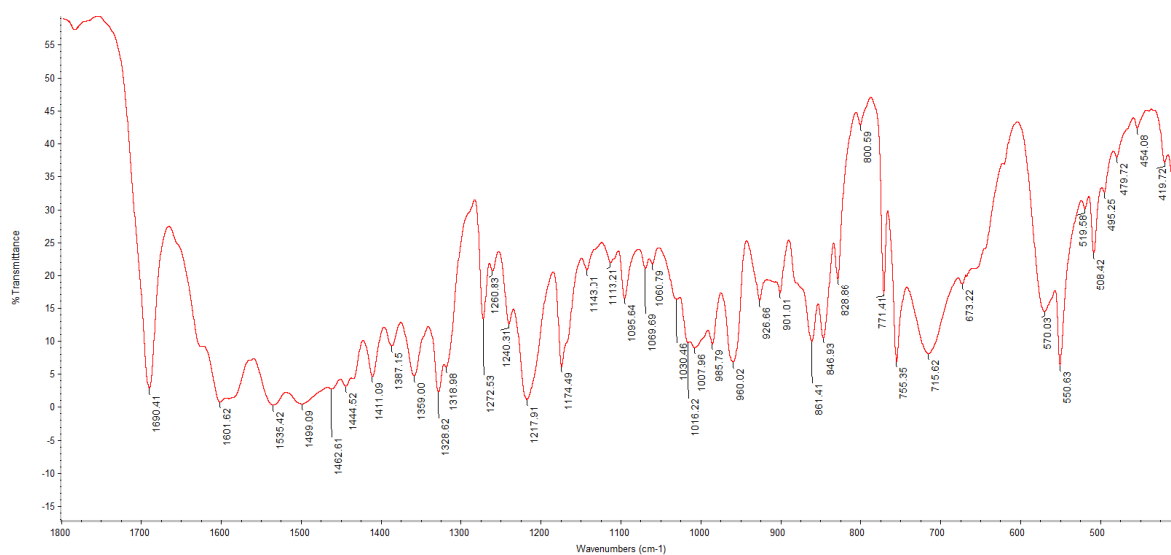

Figure S5: IR spectrum of glasdegib monomaleate 1800-400 cm<sup>-1</sup>.

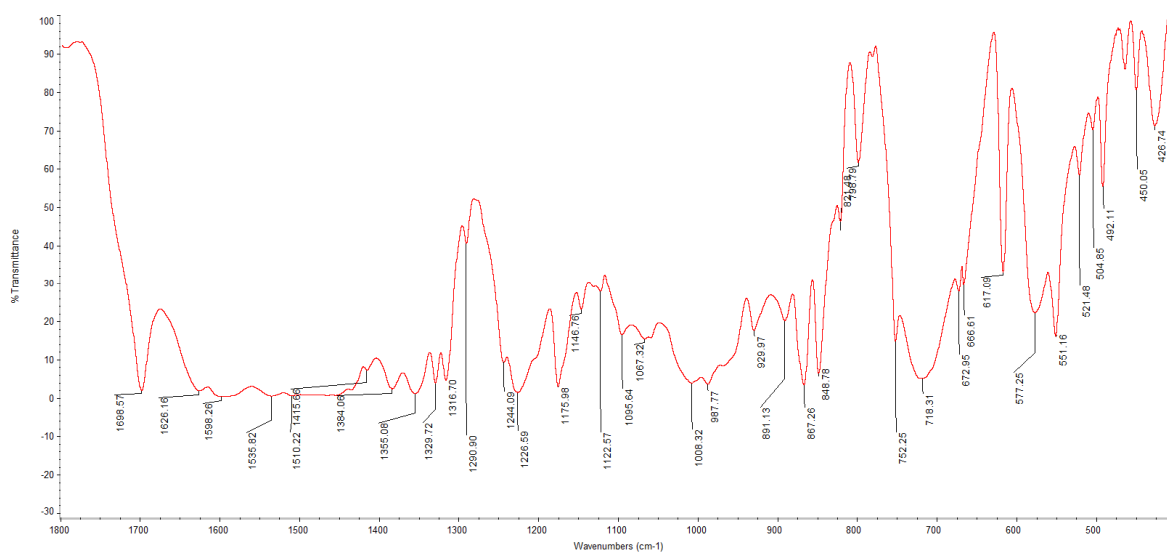

Figure S6: IR spectrum of glasdegib dimaleate 1800-400 cm<sup>-1</sup>.

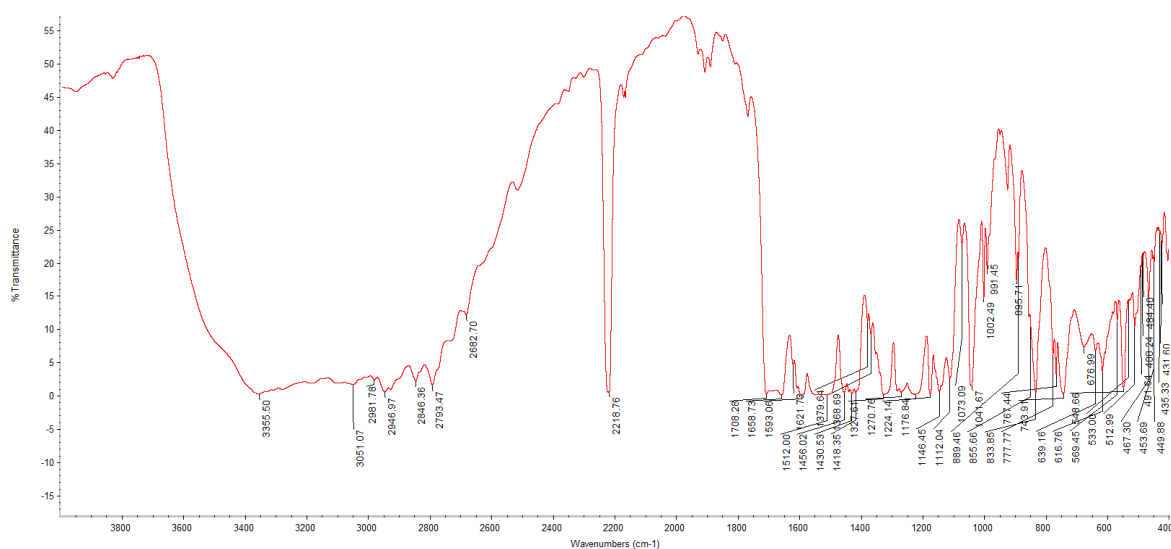

Figure S7: IR spectrum of glasdegib base 4000-400 cm<sup>-1</sup>.

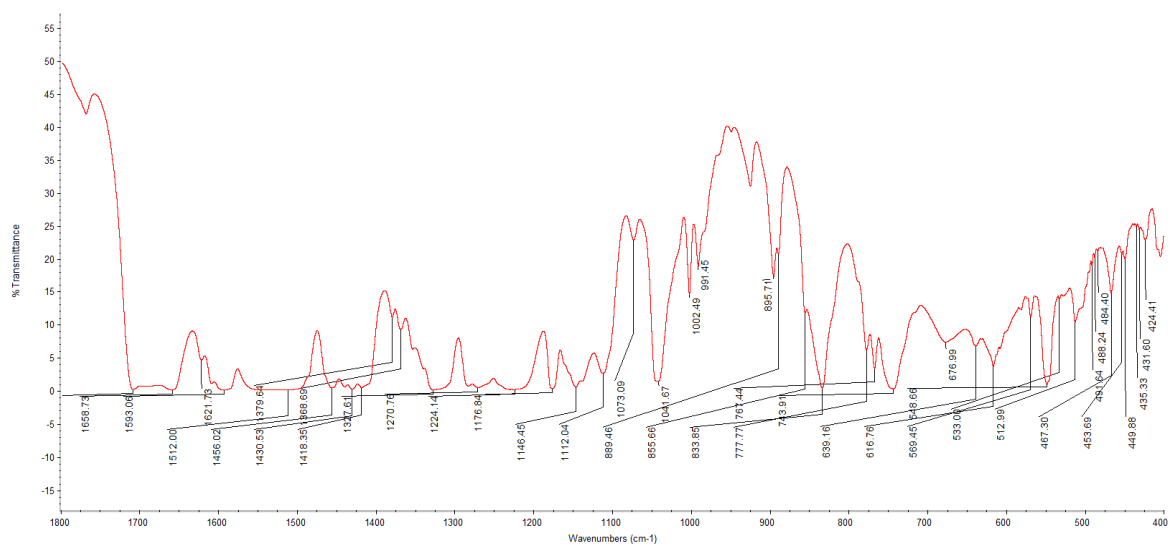

Figure S8: IR spectrum of glasdegib base 1800-400 cm<sup>-1</sup>.

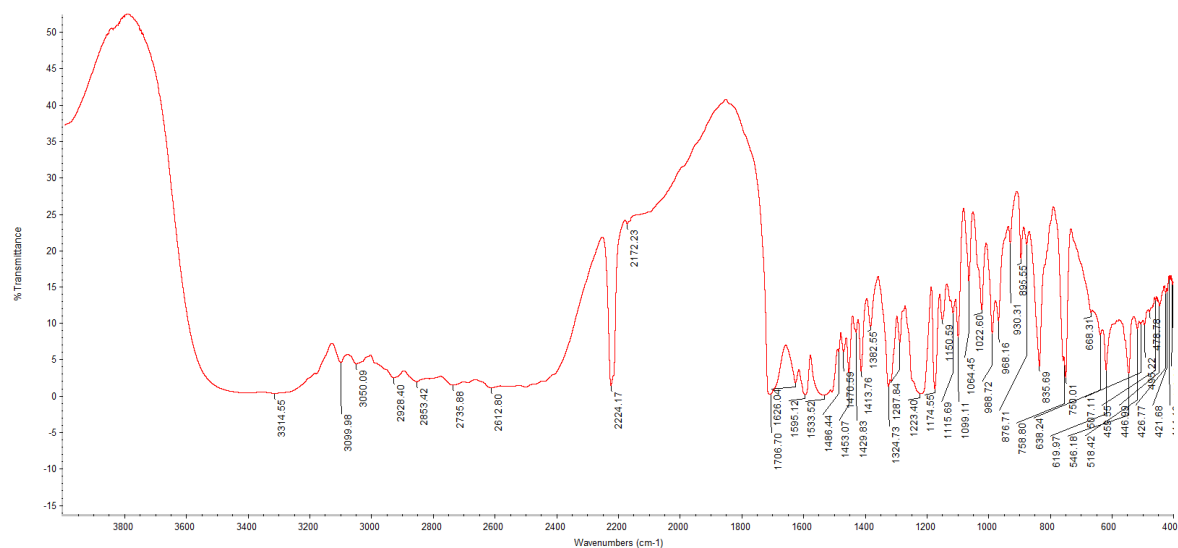

Figure S9. IR spectrum of glasdegib dihydrochloride hydrate 4000-400 cm<sup>-1</sup>.

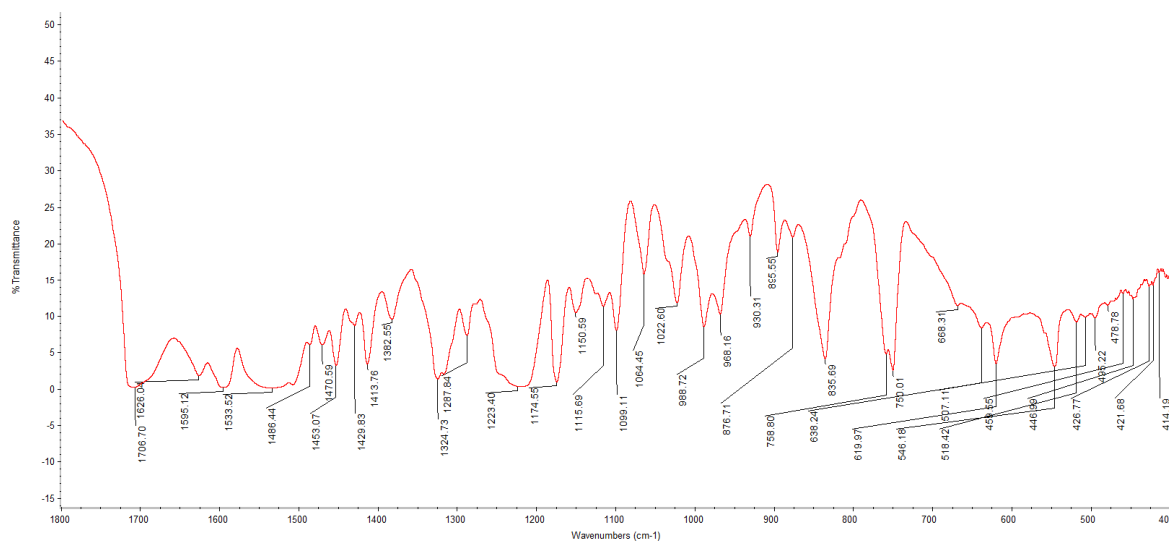

Figure S10. IR spectrum of glasdegib dihydrochloride hydrate 1800-400 cm<sup>-1</sup>.

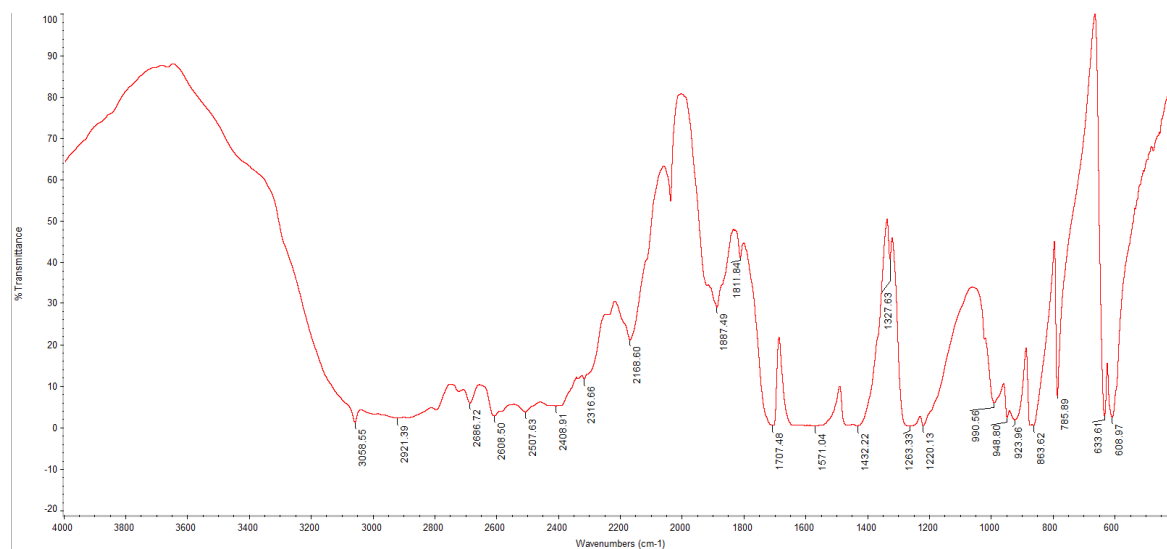

Figure S11. IR spectrum of maleic acid 4000-400 cm<sup>-1</sup>.

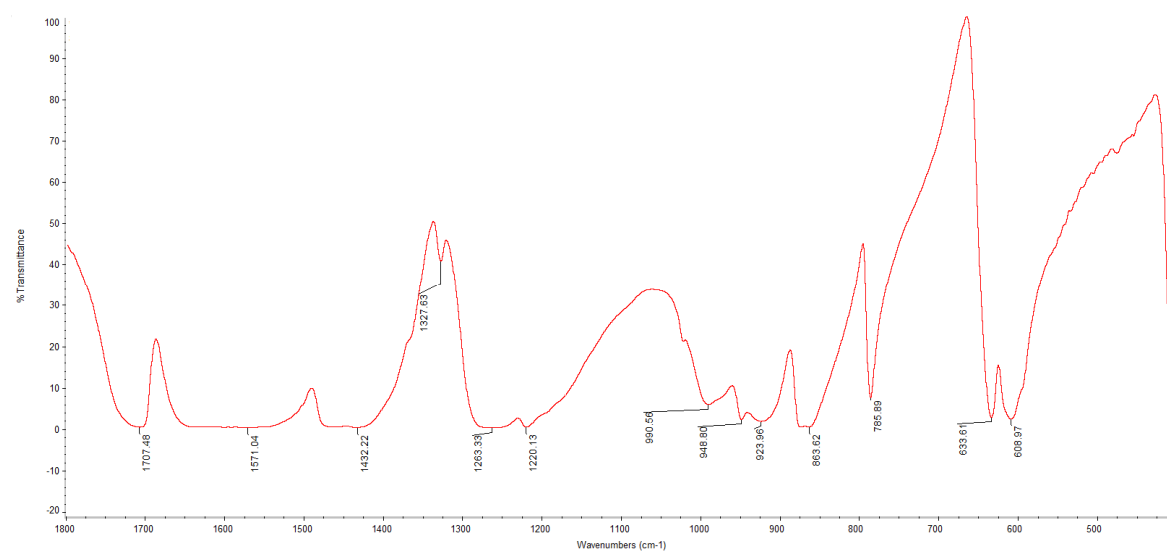

Figure S12. IR spectrum of maleic acid 1800-400 cm<sup>-1</sup>.

### 3. Raman spectra

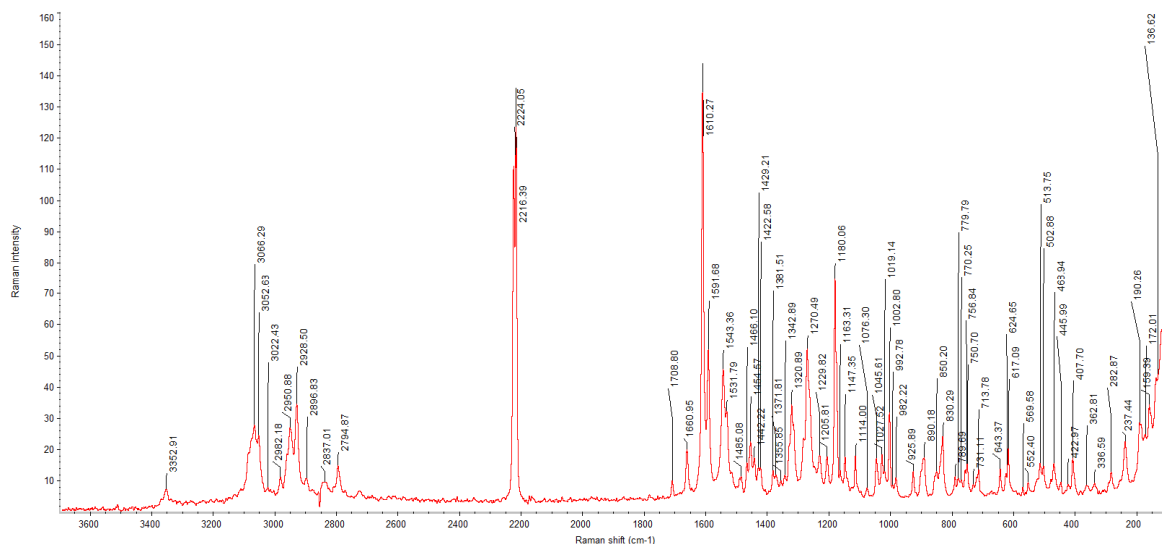

Figure S13. Raman spectrum of glasdegib base.

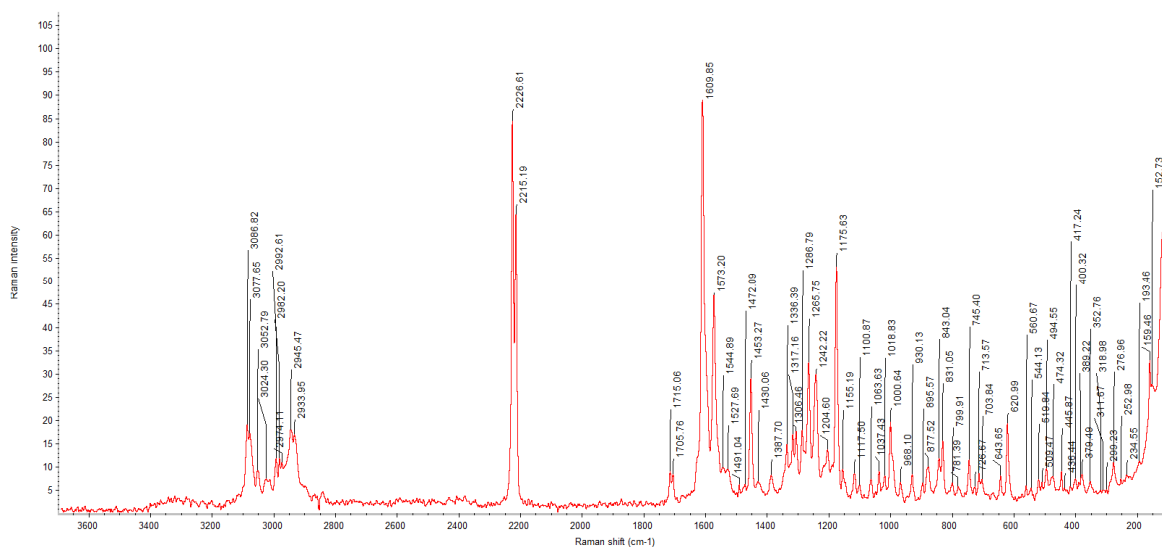

Figure S14. Raman spectrum of glasdegib dihydrochloride.



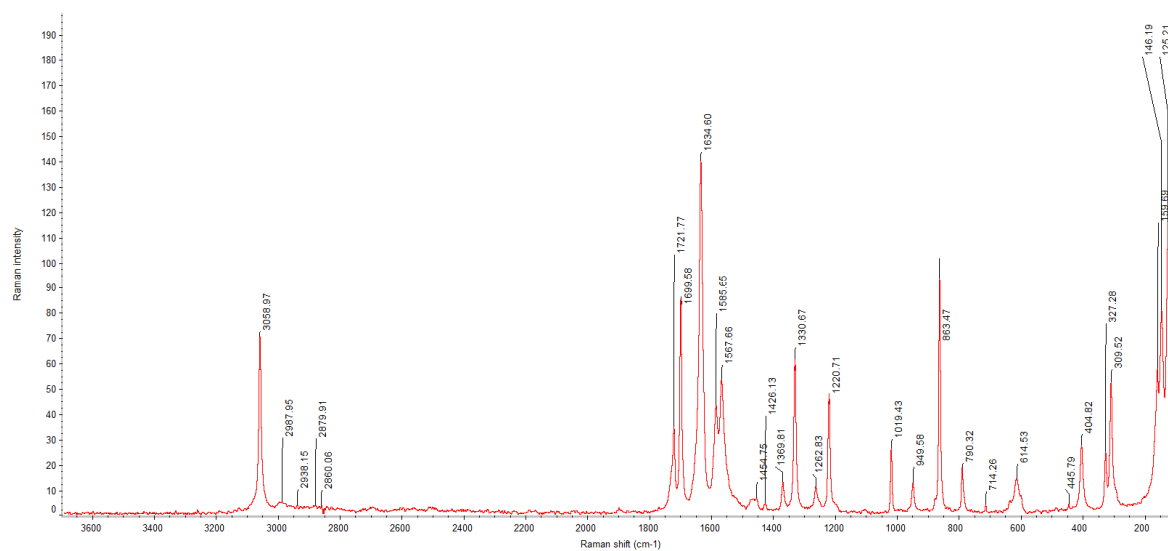

Figure S15. Raman spectrum of maleic acid.

#### 4. PXRD diffractograms

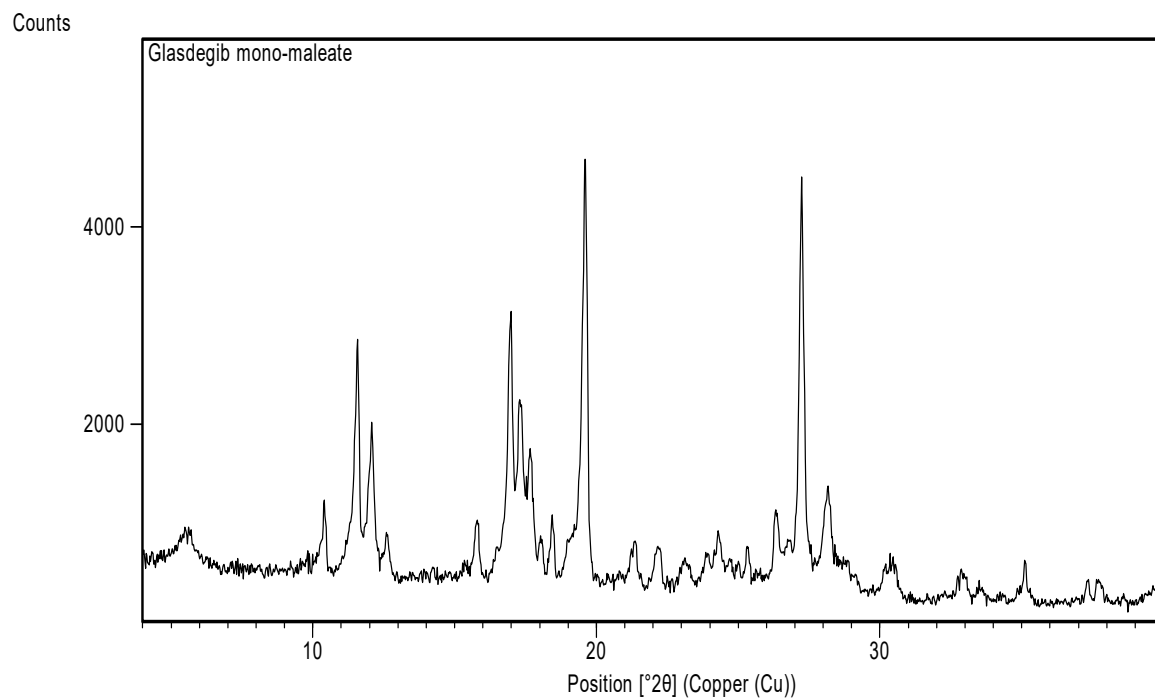

**Figure S16.** Measured PXRD pattern of glasdegib monomaleate powder.

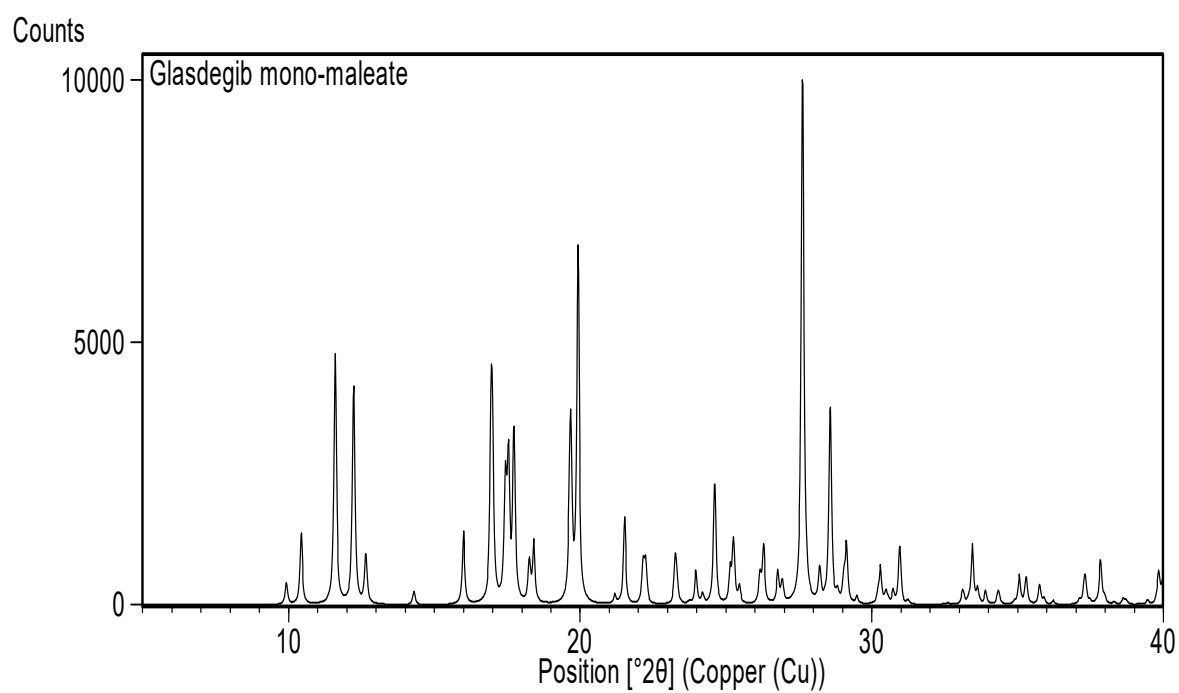

**Figure S17.** Calculated PXRD pattern from the single-crystal structure of glasdegib monomaleate.

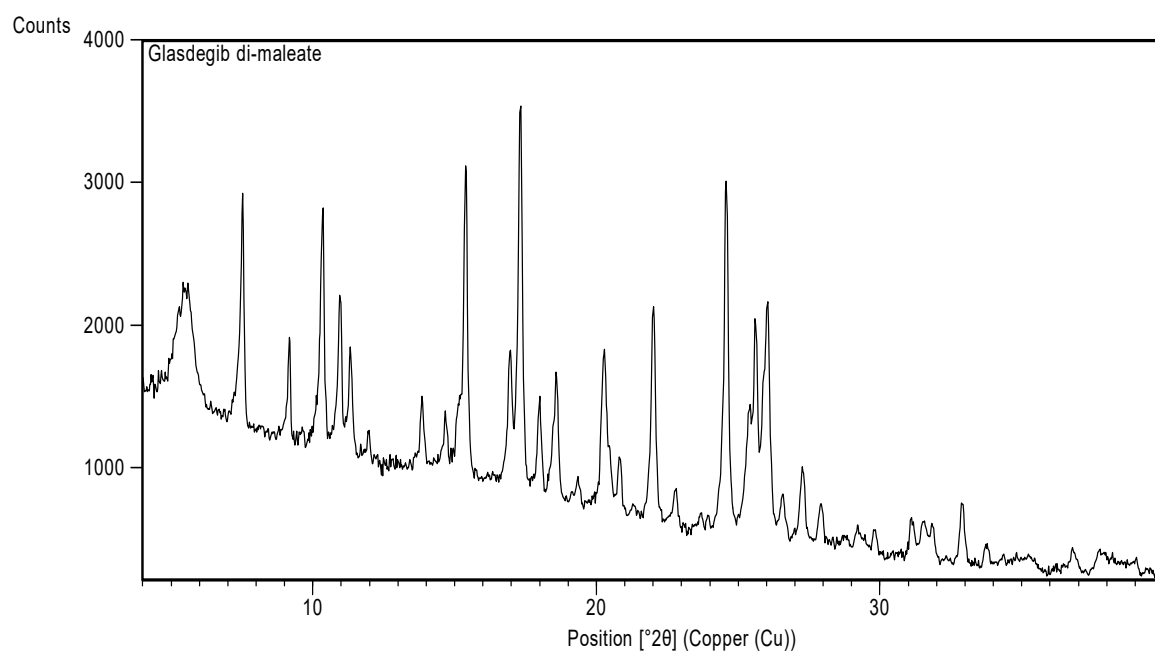

**Figure S18.** Measured PXRD pattern of glasdegib dimaleate powder.

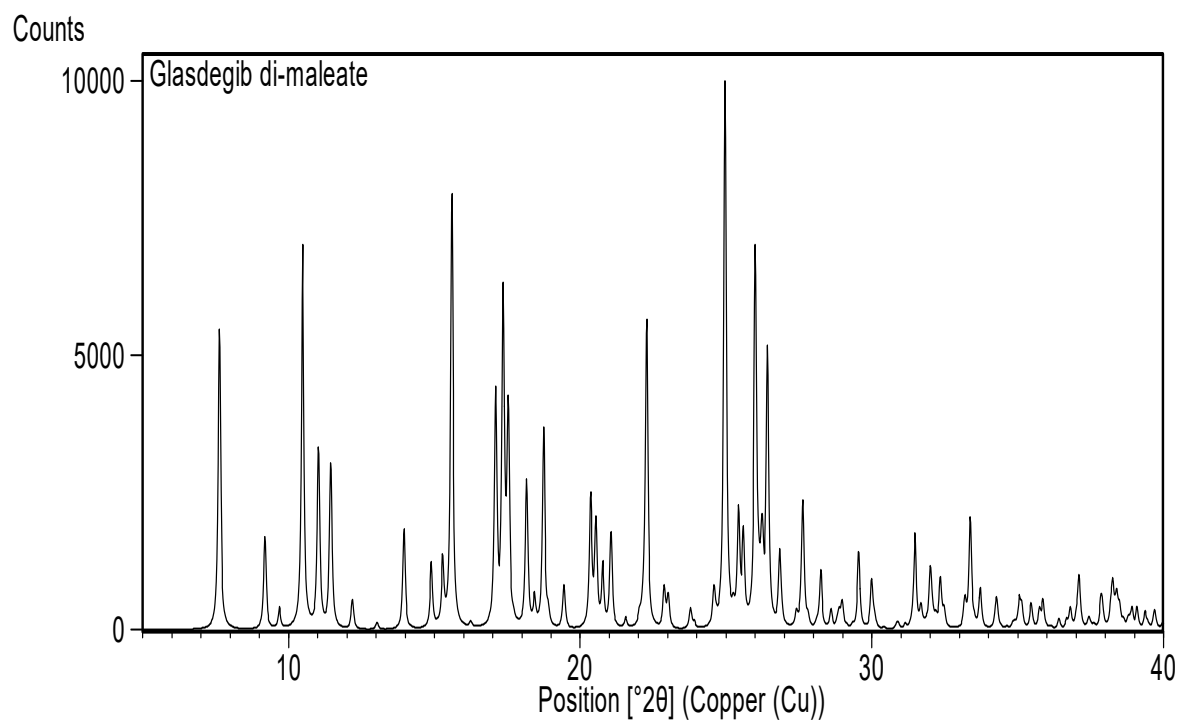

**Figure S19.** Calculated PXRD pattern from the single-crystal structure of glasdegib dimaleate.

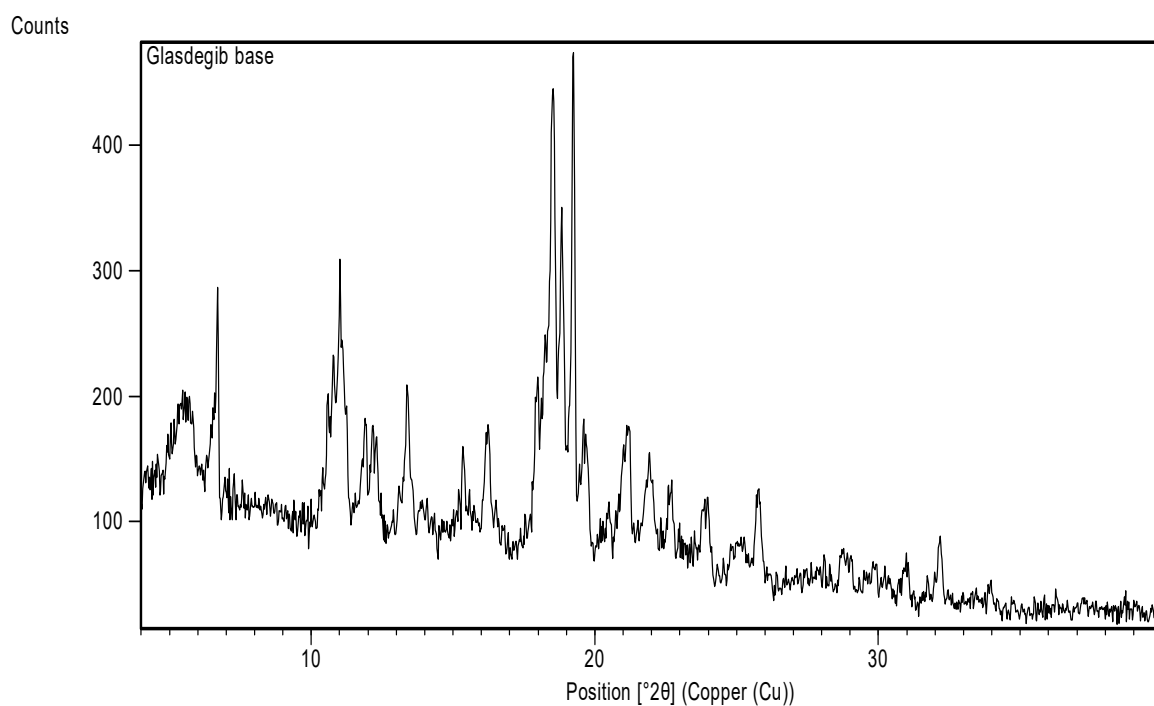

**Figure S20.** Measured PXRD pattern of glasdegib base powder.

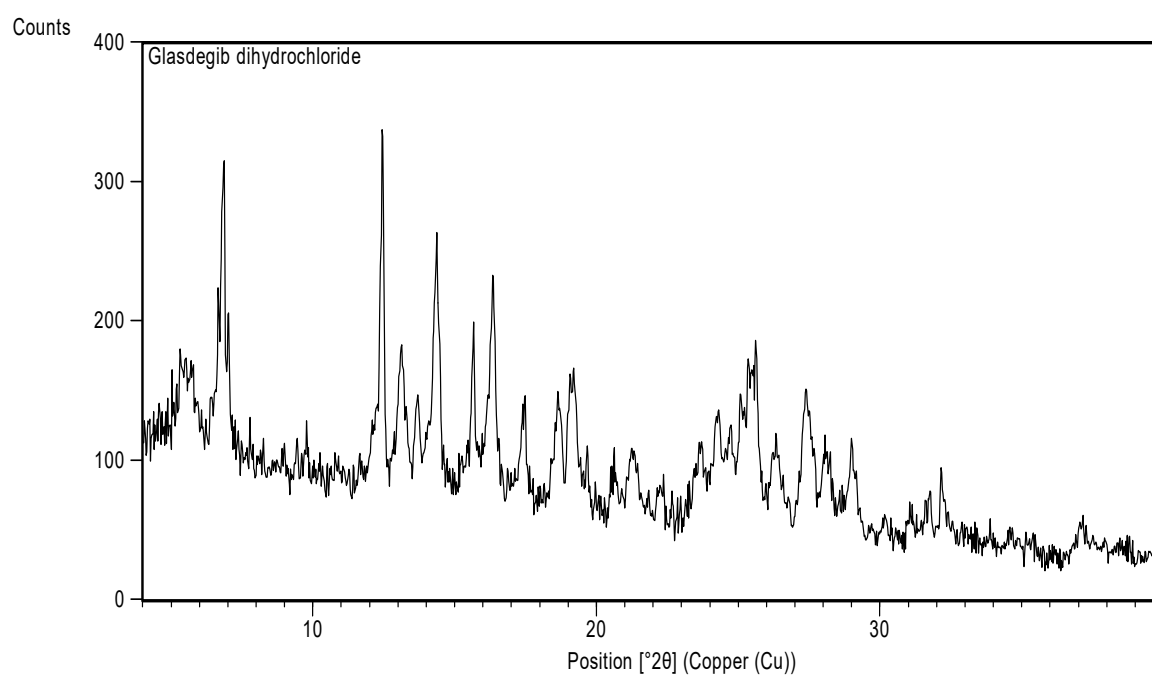

**Figure S21.** Measured PXRD pattern of glasdegib dihydrochloride powder.

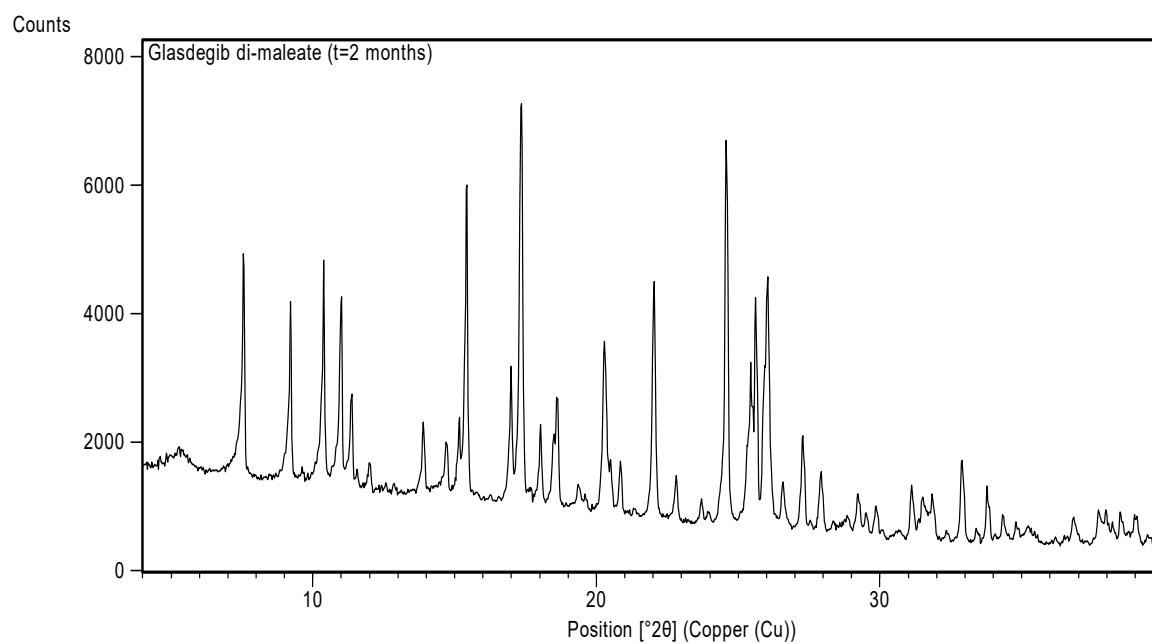

**Figure S22.** Measured PXRD pattern of glasdegib dimaleate powder exposed to stress conditions for 2 months.

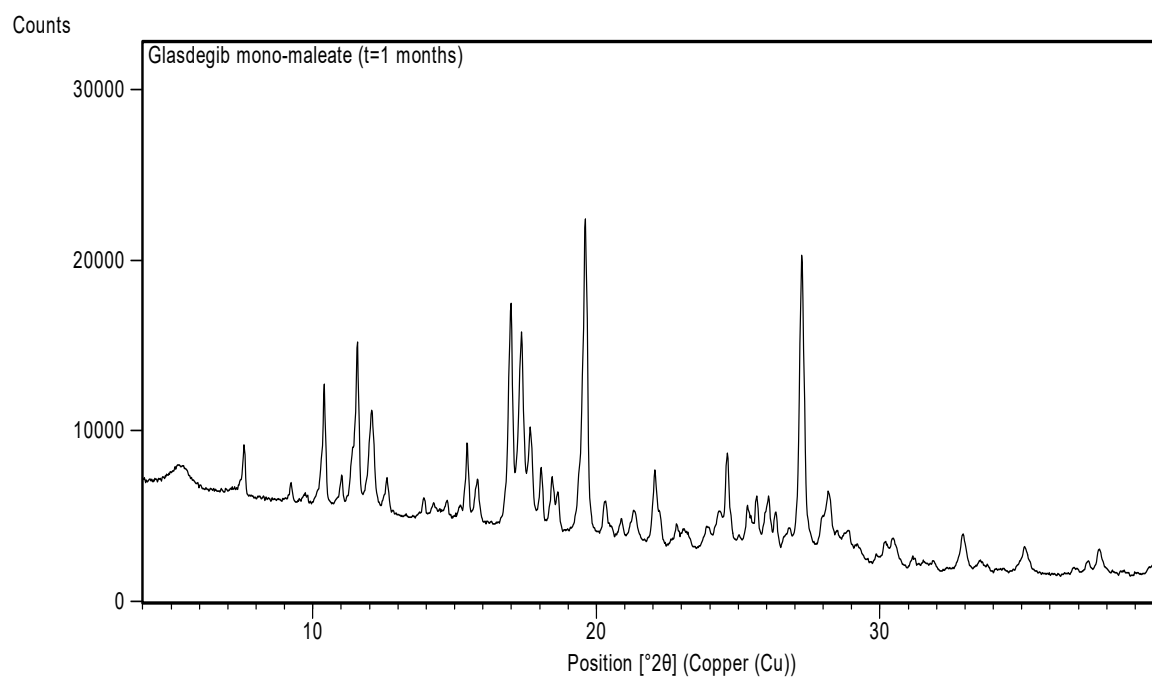

**Figure S23.** Measured PXRD pattern of glasdegib monomaleate powder exposed to stress conditions for 1 months.

## 5. LC Chromatograms

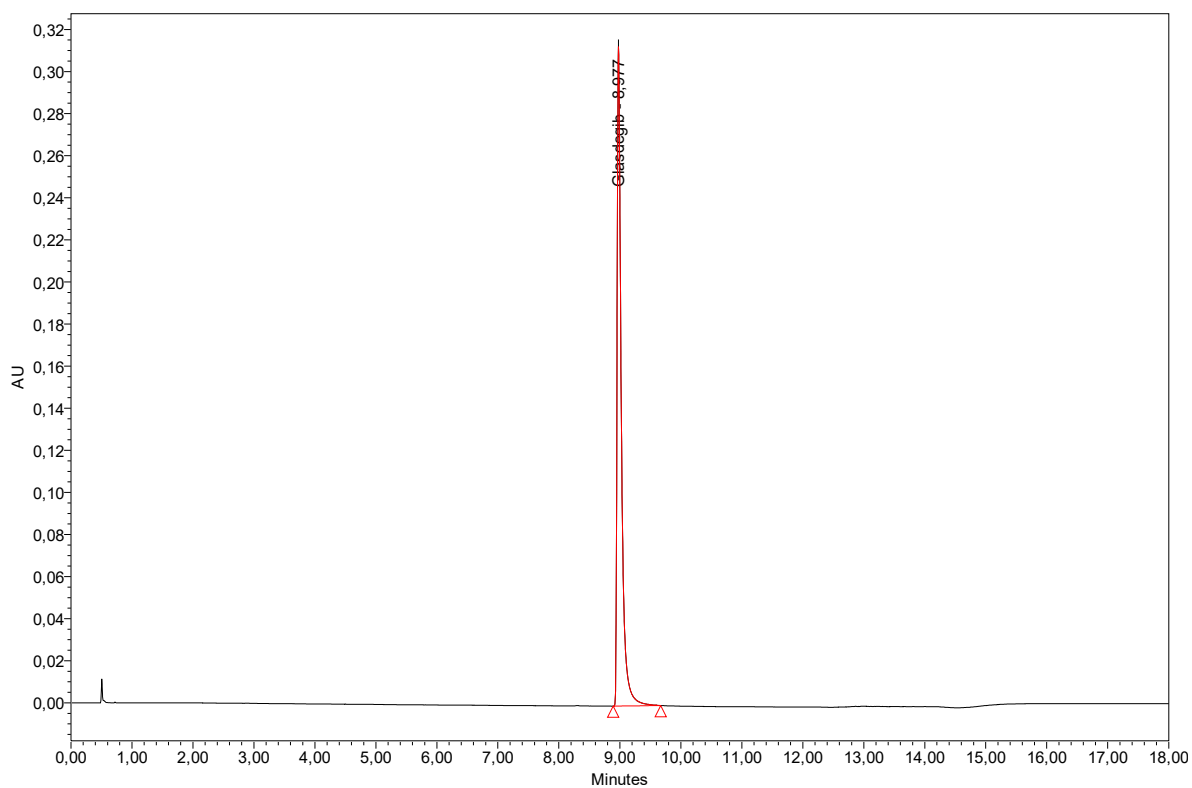

**Figure S24.** Ultra high performance liquid chromatogram of glasdegib for determination of solubility.

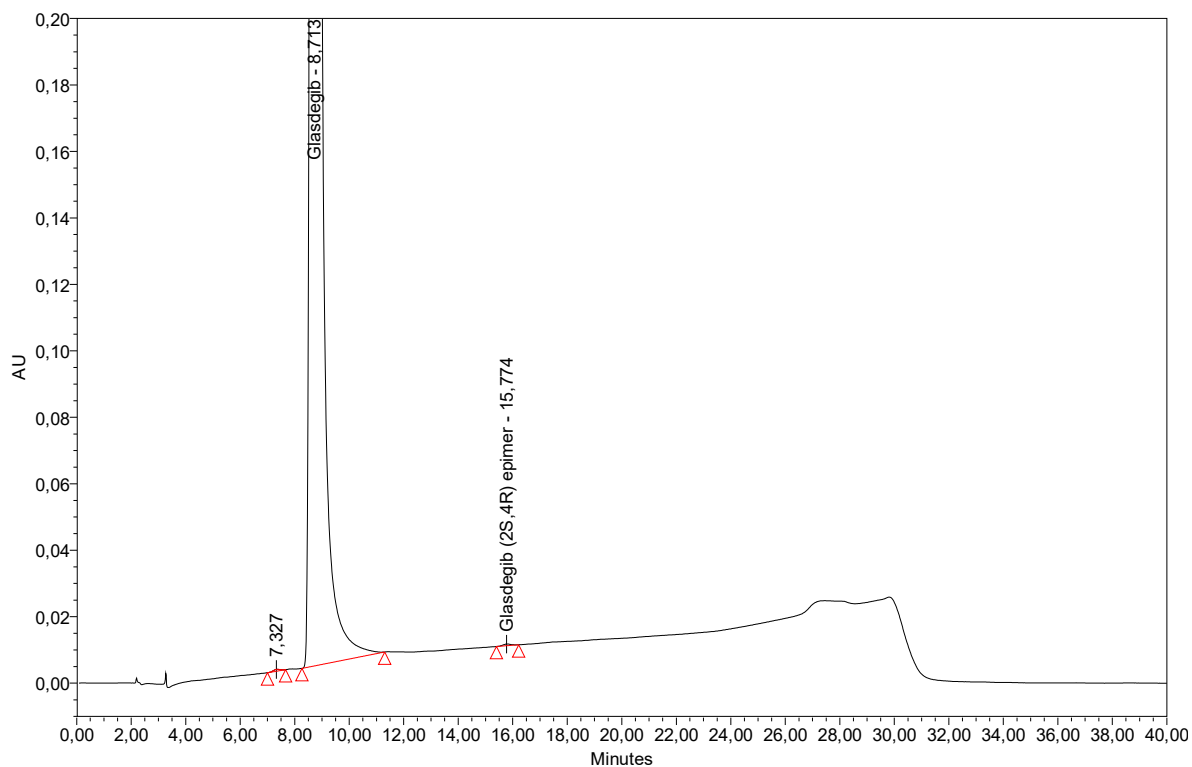

**Figure S25.** Chiral high performance liquid chromatogram for determination of chiral purity.

## 6. ssNMR spectra

### *<sup>1</sup>H echo MAS NMR spectra of glasdegib derivatives*

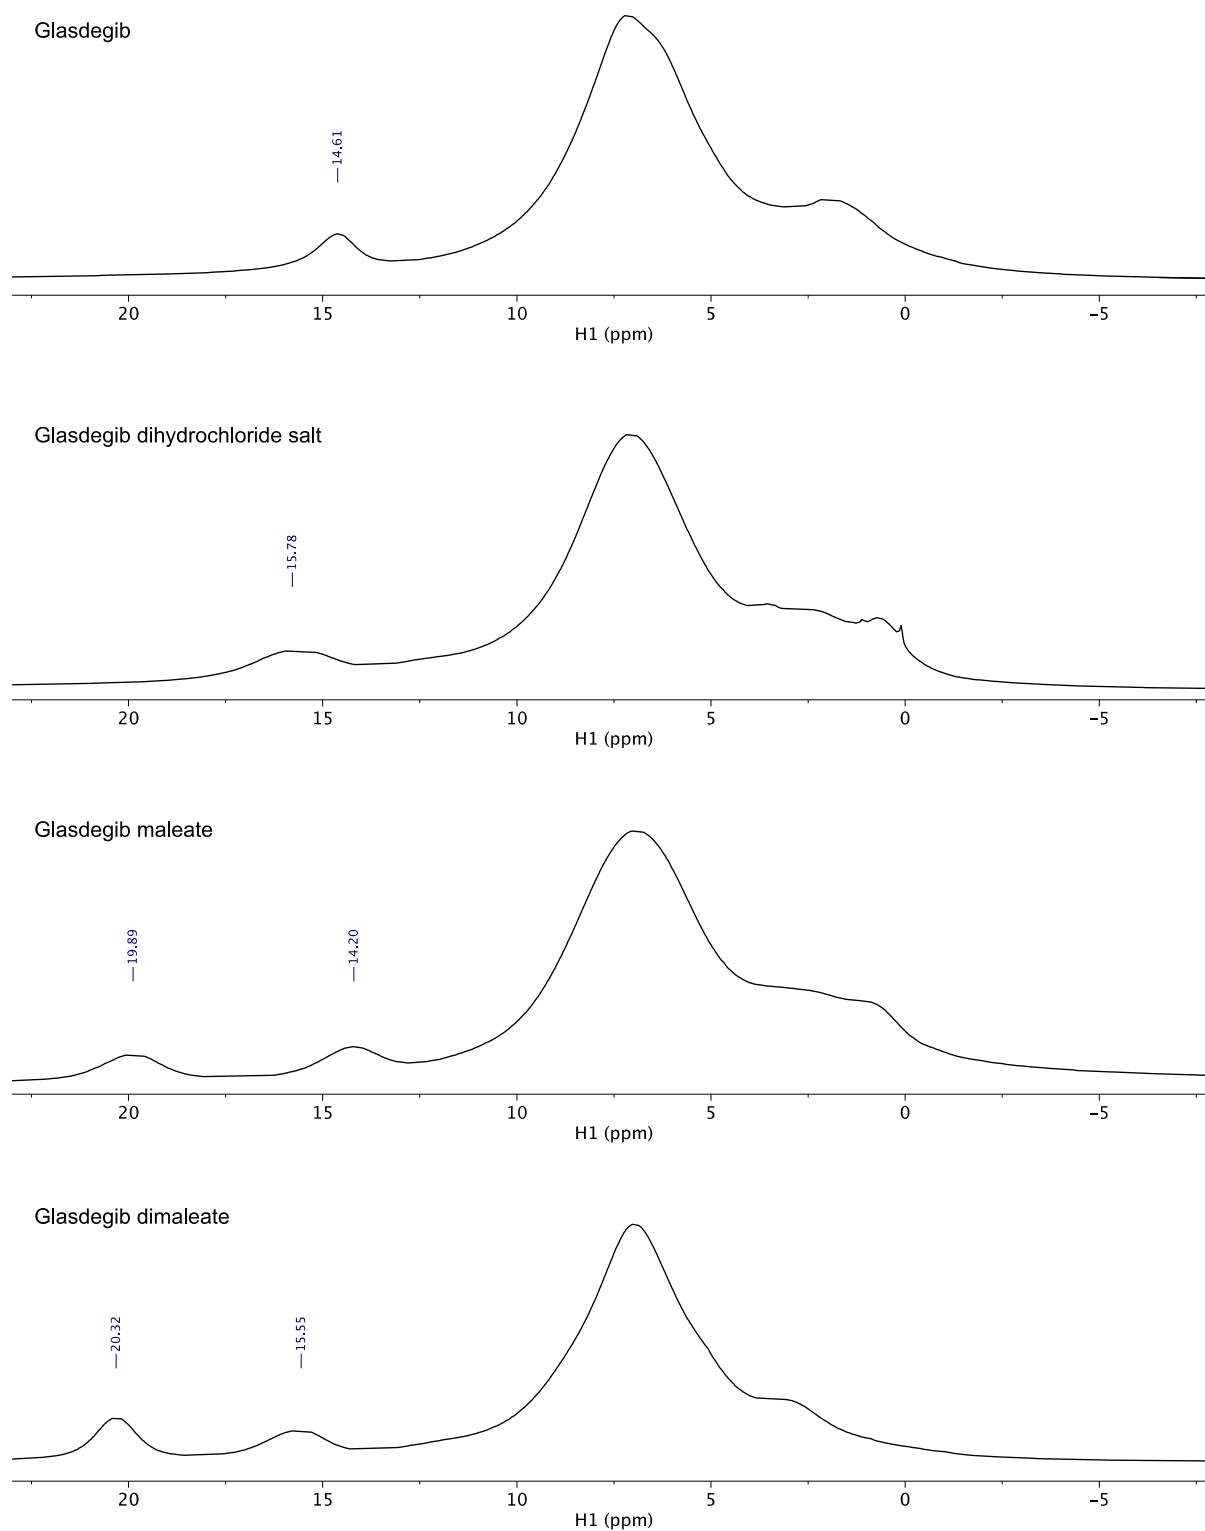

**Figure S26.** <sup>1</sup>H echo MAS NMR spectra of glasdegib base, glasdegib dihydrochloride hydrate, glasdegib monomaleate and glasdegib dimaleate.

## 7. Solution $^1\text{H}$ - and $^{13}\text{C}$ -NMR spectra of glasdegib derivatives

### 7.1. Glasdegib monomaleate

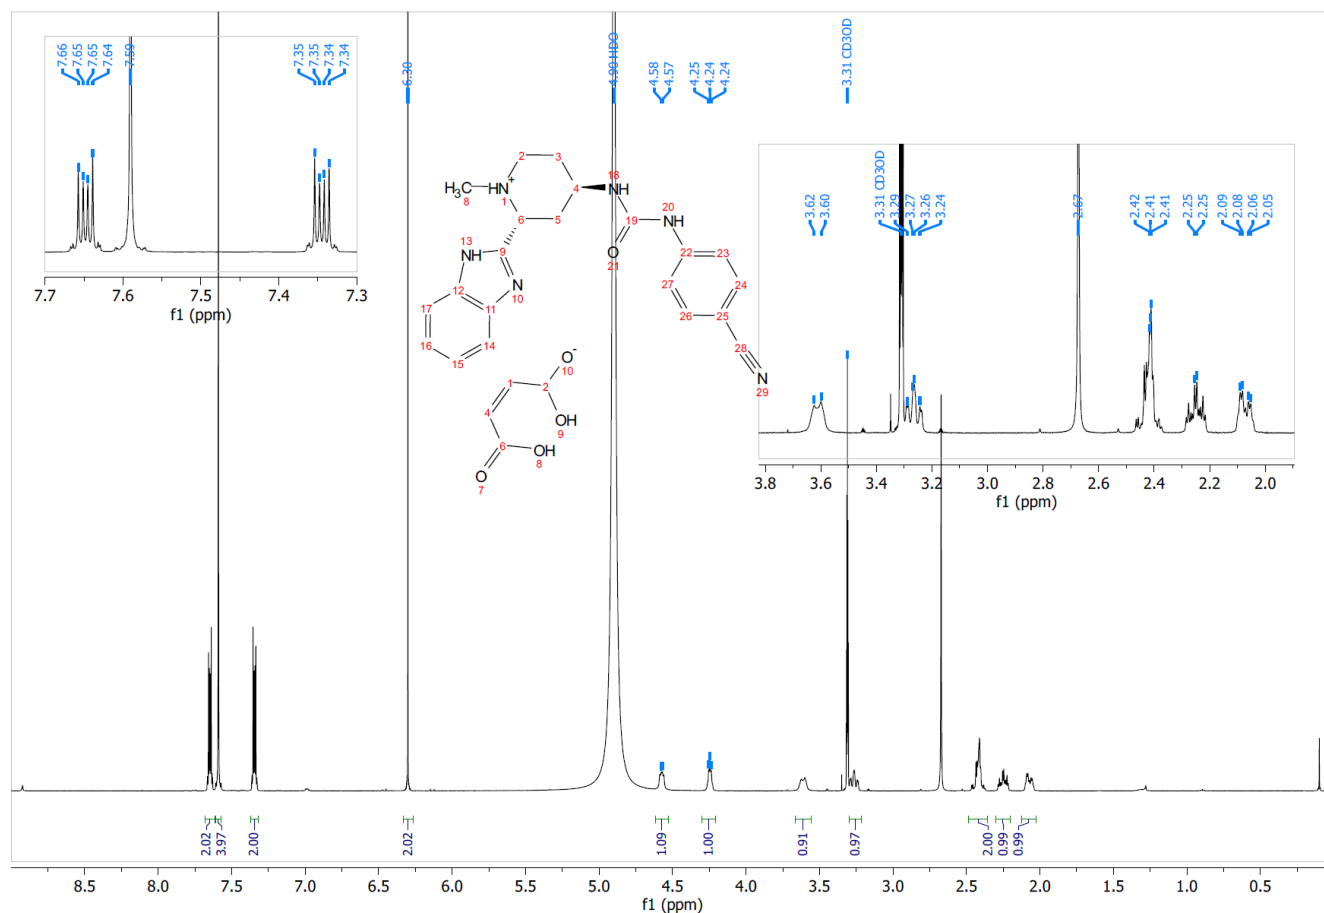

Figure S27.  $^1\text{H}$ -NMR spectrum of glasdegib monomaleate in  $\text{MeOD}$  at 500 MHz.



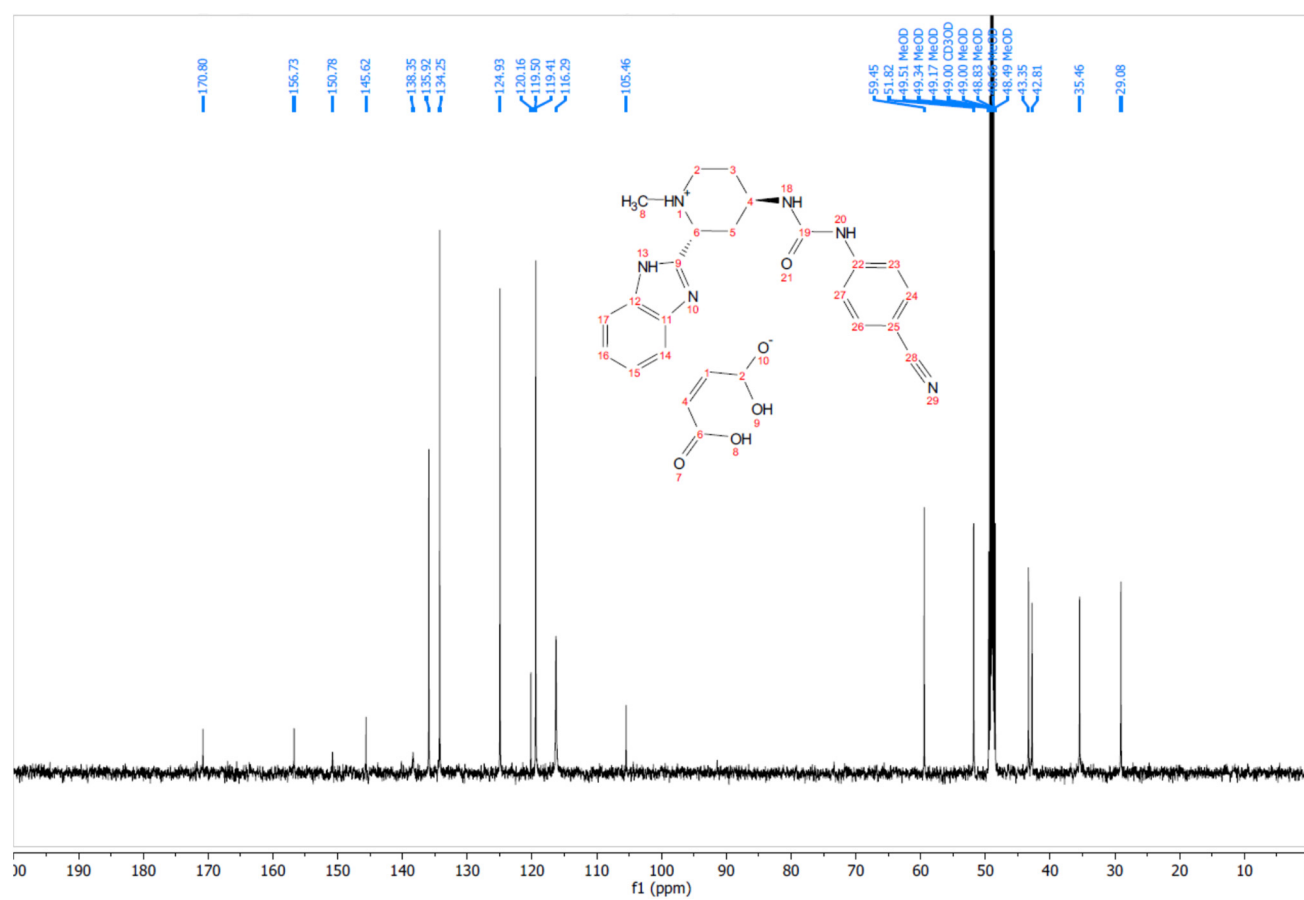

Figure S28. <sup>13</sup>C-NMR spectrum of glasdegib monomaleate in MeOD at 125 MHz.

## 7.2. Glasdegib dimaleate

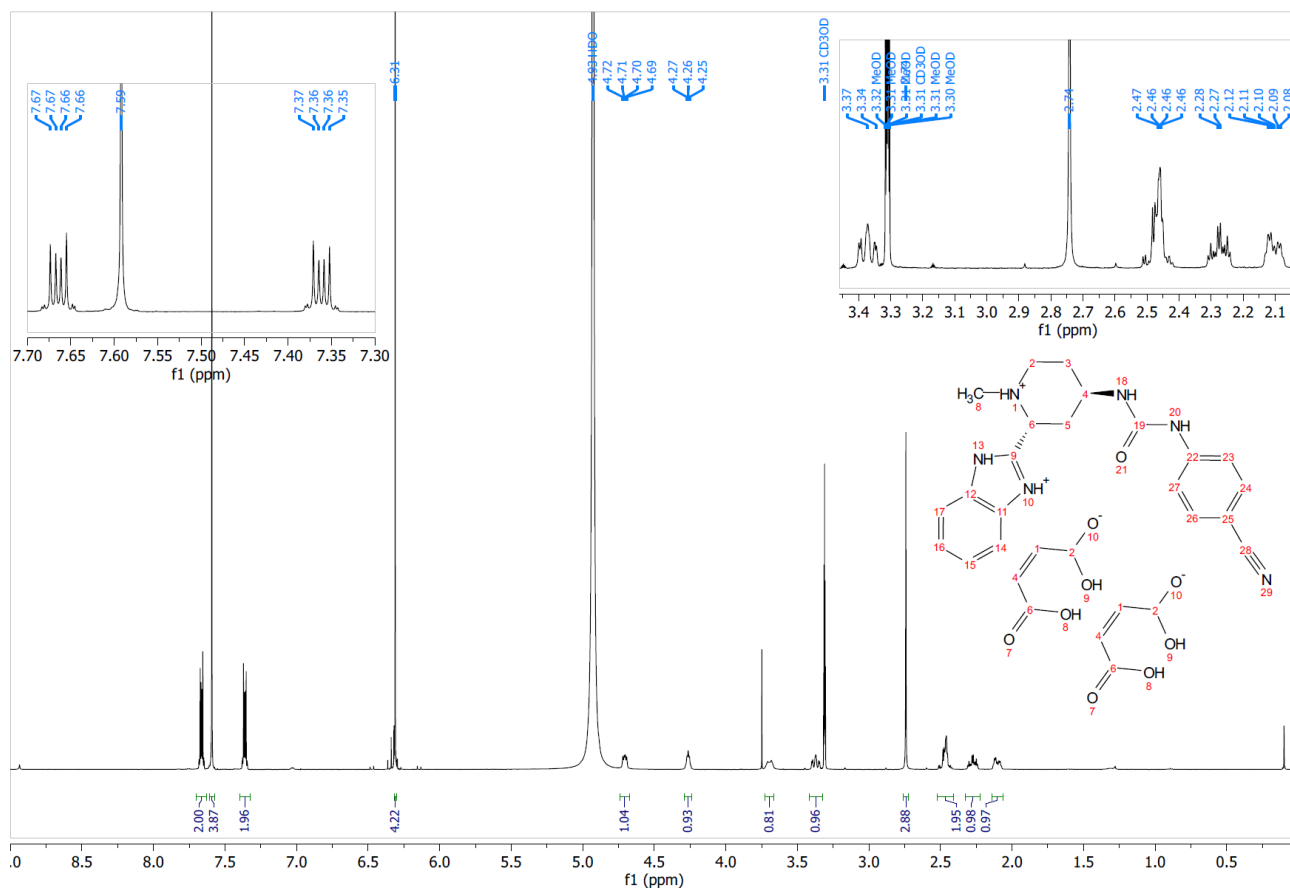

Figure S29. <sup>1</sup>H-NMR spectrum of glasdegib dimaleate in MeOD at 500 MHz.

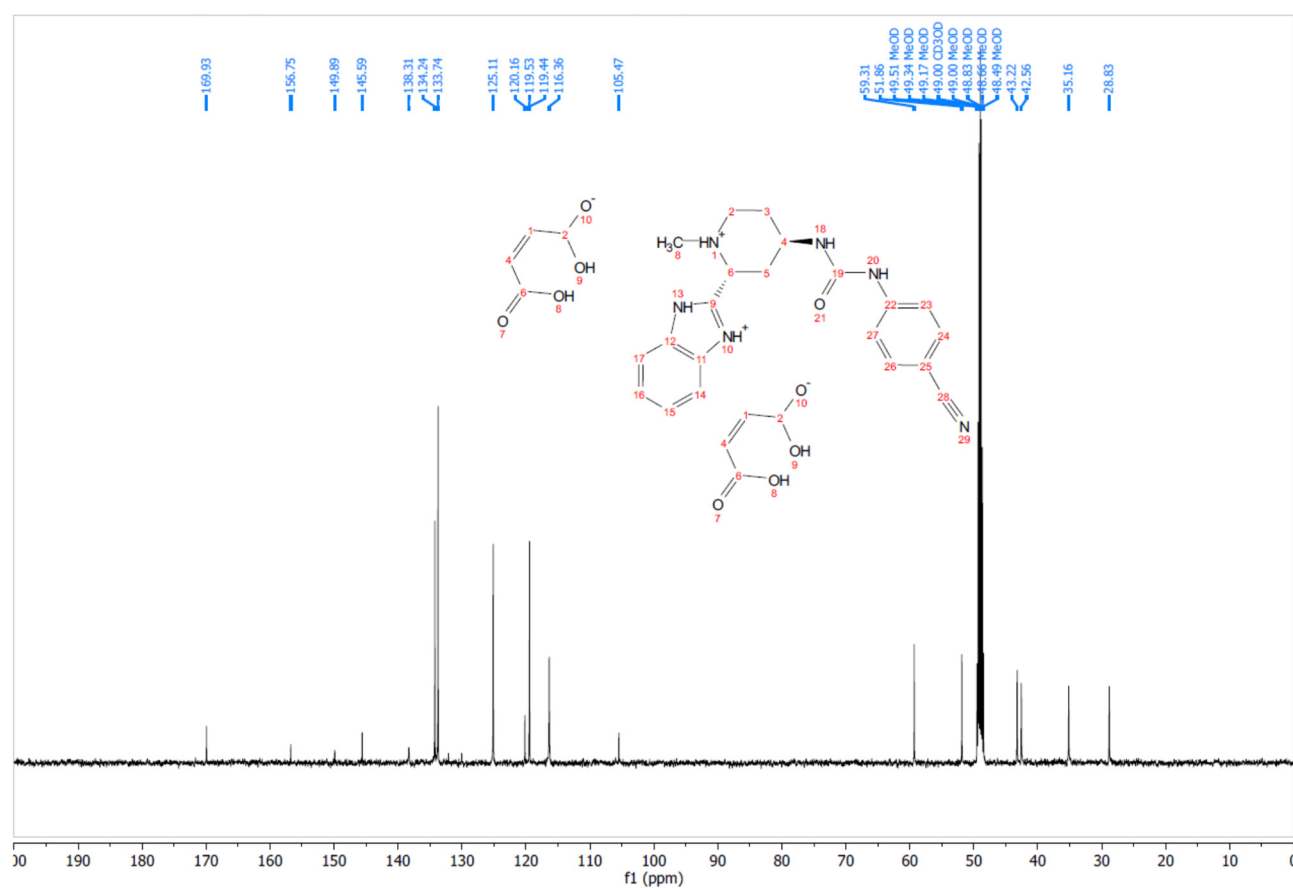

Figure S30.  $^{13}\text{C}$ -NMR spectrum of glasdegib dimaleate in MeOD at 125 MHz.

## 8. Calculated $\text{pK}_a$ data

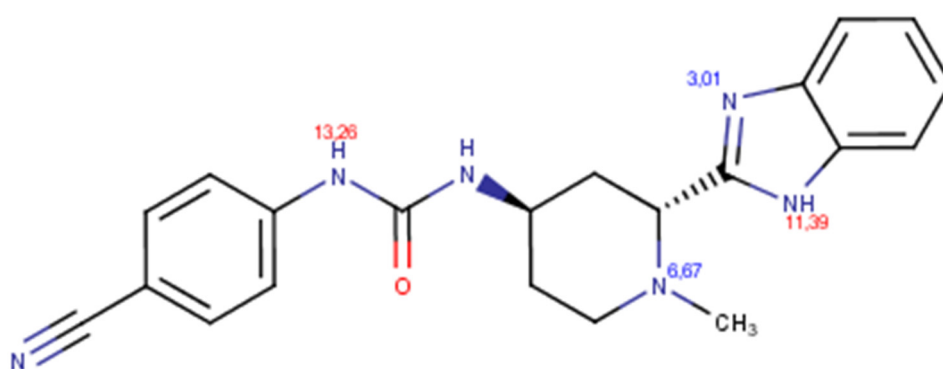

Figure S31. MarvinSketch 17.28 calculated  $\text{pK}_a$  values for glasdegib.

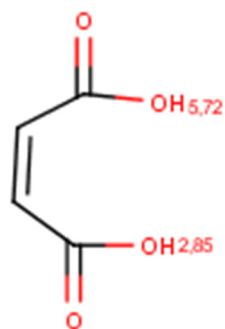

**Figure S32.** MarvinSketch 17.28 calculated  $pK_a$  values for maleic acid.

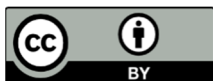

© 2022 by the author. Licensee MDPI, Basel, Switzerland. This article is an open access article distributed under the terms and conditions of the Creative Commons Attribution (CC BY) license (<https://creativecommons.org/licenses/by/4.0/>).
